# Supplementary material for: Multimorbidity Patterns in Elderly Primary Health Care Patients in a South Mediterranean European Region: A Cluster Analysis
Source: PLoS One. 2015 Nov 2;10(11):e0141155. doi: 10.1371/journal.pone.0141155 (PMC4629893; doi:10.1371/journal.pone.0141155)
Supplement: S1 Table — (XLSX) [file pone.0141155.s001.xlsx]

## Sheet: S1_table
	Table S1. Prevalence and composition of diagnostic clusters in women aged 65-79 years
	Cluster rank	Number of patients	Diagnosis prevalence in stratum (%)		Diagnoses
							Prevalence (%)
			≥ 1 diagnosis	≥ 2 diagnosis	Diagnoses	Most frequent specific diagnosis	In stratum	In cluster
	1	113667	91.2	67.8	DG93 I10-I15:Hypertensive diseases
				67.7528	I10-I15:Hypertensive diseases	I10 Essential (primary) hypertension	63.9874	70.1769
				0	E70-E90:Metabolic disorders	E78 Disorders of lipoprotein metabolism and other lipidaemias	57.6703	63.2488
				0	M15-M19:Arthrosis	M17 Gonarthrosis [arthrosis of knee]	41.3157	45.3122
				0	E65-E68:Obesity and other hyperalimentation	E66 Obesity	26.5117	29.0762
				0	E10-E14:Diabetes mellitus	E11 Non-insulin-dependent diabetes mellitus	21.8848	24.0017
	2	96131	77.1133	45.8448	M50-M54:Other dorsopathies	M54 Dorsalgia	32.1525	41.6952
			0	0	M80-M85:Disorders of bone density and structure	M81 Osteoporosis without pathological fracture	27.5248	35.694
			0	0	M70-M79:Other soft tissue disorders	M75 Shoulder lesions	26.8494	34.8181
			0	0	I80-I89:Diseases of veins, lymphatic vessels and lymph nodes, not elsewhere classified	I83 Varicose veins of lower extremities	26.7347	34.6694
			0	0	F40-F48:Neurotic, stress-related and somatoform disorders	F41 Other anxiety disorders	21.4139	27.7694
			0	0	M20-M25:Other joint disorders	M25 Other joint disorders, not elsewhere classified	19.6804	25.5214
	3	92539	74.2319	42.2069	I30-I52:Other forms of heart disease	I48 Atrial fibrillation and flutter	16.9386	22.8185
			0	0	F30-F39:Mood [affective] disorders	F32 Depressive episode	16.3169	21.981
			0	0	E00-E07:Disorders of thyroid gland	E03 Other hypothyroidism	15.5541	20.9533
			0	0	K55-K63:Other diseases of intestines	K59 Other functional intestinal disorders	14.5144	19.5528
			0	0	H25-H28:Disorders of lens	H25 Senile cataract	14.4551	19.4729
			0	0	K20-K31:Diseases of oesophagus, stomach and duodenum	K30 Dyspepsia	13.9914	18.8483
			0	0	J40-J47:Chronic lower respiratory diseases	J45 Asthma	12.4954	16.8329
			0	0	N80-N98:Noninflammatory disorders of female genital tract	N95 Menopausal and other perimenopausal disorders	12.4922	16.8286
			0	0	D10-D36:Benign neoplasms	D22 Melanocytic naevi	11.5127	15.5091
			0	0	K40-K46:Hernia	K44 Diaphragmatic hernia	10.7082	14.4253
			0	0	H40-H42:Glaucoma	H40 Glaucoma	8.37705	11.285
	4	68431	54.8932	22.4615	K00-K14:Diseases of oral cavity, salivary glands and jaws	K02 Dental caries	12.0341	21.9228
			0	0	H90-H95:Other disorders of ear	H91 Other hearing loss	10.9616	19.969
			0	0	J00-J06:Acute upper respiratory infections	J00 Acute nasopharyngitis [common cold]	10.6279	19.3611
			0	0	L20-L30:Dermatitis and eczema	L21 Seborrhoeic dermatitis	9.88673	18.0108
			0	0	F50-F59:Behavioural syndromes associated with physiological disturbances and physical factors	F51 Nonorganic sleep disorders	8.42197	15.3425
			0	0	G40-G47:Episodic and paroxysmal disorders	G43 Migraine	8.37304	15.2533
			0	0	N30-N39:Other diseases of urinary system	N39 Other disorders of urinary system	8.14763	14.8427
			0	0	J30-J39:Other diseases of upper respiratory tract	J30 Vasomotor and allergic rhinitis	7.39119	13.4647
			0	0	G50-G59:Nerve, nerve root and plexus disorders	G56 Mononeuropathies of upper limb	6.57137	11.9712
			0	0	B35-B49:Mycoses	B35 Dermatophytosis	5.97456	10.884
	5	32389	25.9815	5.32319	H53-H54:Visual disturbances and blindness	H54 Visual impairment including blindness (binocular or monocular)	6.03793	23.2394
			0	0	L80-L99:Other disorders of the skin and subcutaneous tissue	L82 Seborrhoeic keratosis	4.83708	18.6174
			0	0	H00-H06:Disorders of eyelid, lacrimal system and orbit	H04 Disorders of lacrimal system	4.8074	18.5032
			0	0	H10-H13:Disorders of conjunctiva	H10 Conjunctivitis	4.50899	17.3547
			0	0	B00-B09:Viral infections characterized by skin and mucous membrane lesions	B07 Viral warts	4.13278	15.9066
			0	0	N60-N64:Disorders of breast	N60 Benign mammary dysplasia	4.09668	15.7677
			0	0	L60-L75:Disorders of skin appendages	L72 Follicular cysts of skin and subcutaneous tissue	4.06299	15.638
	6	19468	15.6166	1.56824	T08-T14:Injuries to unspecified part of trunk, limb or body region	T14 Injury of unspecified body region	5.41544	34.6774
			0	0	H60-H62:Diseases of external ear	H61 Other disorders of external ear	4.55953	29.1966
			0	0	J20-J22:Other acute lower respiratory infections	J20 Acute bronchitis	4.18492	26.7978
			0	0	H80-H83:Diseases of inner ear	H81 Disorders of vestibular function	3.16055	20.2383
	7	18,350	14.7198	1.7391	I20-I25:Ischaemic heart diseases	I25 Chronic ischaemic heart disease	5.29432	35.9673
			0	0	D50-D53:Nutritional anaemias	D50 Iron deficiency anaemia	4.96543	33.733
			0	0	I60-I69:Cerebrovascular diseases	I64 Stroke, not specified as haemorrhage or infarction	3.85041	26.158
			0	0	I70-I79:Diseases of arteries, arterioles and capillaries	I73 Other peripheral vascular diseases	2.52683	17.1662
	8	15802	12.6759	1.23775	M45-M49:Spondylopathies	M47 Spondylosis	8.80782	69.4849
			0	0	M40-M43:Deforming dorsopathies	M41 Scoliosis	5.10581	40.2797
	9	15133	12.1392	1.26342	K80-K87:Disorders of gallbladder, biliary tract and pancreas	K80 Cholelithiasis	6.86015	56.5123
			0	0	K70-K77:Diseases of liver	K76 Other diseases of liver	3.99801	32.9346
			0	0	B15-B19:Viral hepatitis	B18 Chronic viral hepatitis	2.62149	21.5952
	10	9154	7.34306	0.616066	N17-N19:Renal failure	N18 Chronic kidney disease	4.96061	67.5552
			0	0	D60-D64:Aplastic and other anaemias	D64 Other anaemias	2.99851	40.8346
	11	7978	6.3997	0.235838	M05-M14:Inflammatory polyarthropathies	M13 Other arthritis	4.47851	69.9799
			0	0	M30-M36:Systemic connective tissue disorders	M35 Other systemic involvement of connective tissue	2.15703	33.7052
	12	7693	6.17109	0.154016	M65-M68:Disorders of synovium and tendon	M65 Synovitis and tenosynovitis	3.35948	54.4391
			0	0	L50-L54:Urticaria and erythema	L50 Urticaria	2.96562	48.0567
	13	6146	4.93013	0.22942	H30-H36:Disorders of choroid and retina	H35 Other retinal disorders	4.15283	84.2336
			0	0	G60-G64:Polyneuropathies and other disorders of the peripheral nervous system	G63 Polyneuropathy in diseases classified elsewhere	1.00672	20.4198
	14	5,790	4.64456	0.165247	N20-N23:Urolithiasis	N20 Calculus of kidney and ureter	3.20386	68.981
			0	0	N25-N29:Other disorders of kidney and ureter	N28 Other disorders of kidney and ureter, not elsewhere classified	1.60594	34.5769
	15	4608	3.6964	0.0970625	K50-K52:Noninfective enteritis and colitis	K52 Other noninfective gastroenteritis and colitis	2.06157	55.7726
			0	0	A00-A09:Intestinal infectious diseases	A09 Other gastroenteritis and colitis of infectious and unspecified origin	1.73188	46.8533
	16	4591	3.68276	0.101073	S40-S49:Injuries to the shoulder and upper arm	S42 Fracture of shoulder and upper arm	1.93483	52.5376
			0	0	W00-W19:Falls	W19 Unspecified fall	1.849	50.2069
	17	4415	3.54158	0.110699	L55-L59:Radiation-related disorders of the skin and subcutaneous tissue	L57 Skin changes due to chronic exposure to nonionizing radiation	1.89071	53.3862
			0	0	C43-C44:Melanoma and other malignant neoplasms of skin	C44 Other malignant neoplasms of skin	1.76156	49.7395
	18	3799	3.04744	0.213377	F00-F09:Organic, including symptomatic, mental disorders	F03 Unspecified dementia	2.1466	70.4396
			0	0	G30-G32:Other degenerative diseases of the nervous system	G30 Alzheimer disease	1.11421	36.5623
	19	4566	3.6627	0	C50-C50: Malignant neoplasm of breast	C50 Malignant neoplasm of breast	3.6627	100
	20	3841	3.08113	0	F10-F19:Mental and behavioural disorders due to psychoactive substance use	F17 Mental and behavioural disorders due to use of tobacco	3.08113	100
	21	3833	3.07471	0	Y40-Y59:Drugs, medicaments and biological substances causing adverse effects in therapeutic use	Y52 Agents primarily affecting the cardiovascular system	3.07471	100
	22	3641	2.9207	0	S80-S89:Injuries to the knee and lower leg	S83 Dislocation, sprain and strain of joints and ligaments of knee	2.9207	100
	23	3312	2.65678	0	G20-G26:Extrapyramidal and movement disorders	G25 Other extrapyramidal and movement disorders	2.65678	100
	24	3169	2.54207	0	H49-H52:Disorders of ocular muscles, binocular movement, accommodation and refraction	H52 Disorders of refraction and accommodation	2.54207	100
	25	3,010	2.41453	0	Q38-Q45:Other congenital malformations of the digestive system	Q40 Other congenital malformations of upper alimentary tract	2.41453	100
	26	2,970	2.38244	0	L40-L45:Papulosquamous disorders	L40 Psoriasis	2.38244	100
	27	2513	2.01585	0	H65-H75:Diseases of middle ear and mastoid	H65 Nonsuppurative otitis media	2.01585	100
	28	2,149	1.72386	0	C15-C26:Digestive organs	C18 Malignant neoplasm of colon	1.72386	100
	29	2,090	1.67653	0	H55-H59:Other disorders of eye and adnexa	H57 Other disorders of eye and adnexa	1.67653	100
	30	1976	1.58509	0	S90-S99:Injuries to the ankle and foot	S93 Dislocation, sprain and strain of joints and ligaments at ankle and foot level	1.58509	100
	31	1,799	1.4431	0	I05-I09:Chronic rheumatic heart diseases	I05 Rheumatic mitral valve diseases	1.4431	100
	32	1765	1.41583	0	L00-L08:Infections of the skin and subcutaneous tissue	L03 Cellulitis	1.41583	100
	33	1722	1.38134	0	W50-W64:Exposure to animate mechanical forces	W57 Bitten or stung by nonvenomous insect and other nonvenomous arthropods	1.38134	100
	34	1,626	1.30433	0	D70-D77:Other diseases of blood and blood-forming organs	D72 Other disorders of white blood cells	1.30433	100
	35	1,550	1.24336	0	D00-D09:In situ neoplasms	D04 Carcinoma in situ of skin	1.24336	100
	36	1,546	1.24015	0	S20-S29:Injuries to the thorax	S20 Superficial injury of thorax	1.24015	100
	37	1,493	1.19764	0	J09-J18:Influenza and pneumonia	J18 Pneumonia, organism unspecified	1.19764	100
	38	1449	1.16234	0	S50-S59:Injuries to the elbow and forearm	S52 Fracture of forearm	1.16234	100
	39	1,422	1.14068	0	S00-S09:Injuries to the head	S00 Superficial injury of head	1.14068	100
	40	1338	1.0733	0	S60-S69:Injuries to the wrist and hand	S62 Fracture at wrist and hand level	1.0733	100
	41	1,326	1.06368	0	C51-C58: Malignant neoplasms of female genital organs	C54 Malignant neoplasm of corpus uteri	1.06368	100
	42	1,294	1.03801	0	K90-K93:Other diseases of the digestive system	K92 Other diseases of digestive system	1.03801	100
